# Supplementary material for: CDK8 Selectively Promotes the Growth of Colon Cancer Metastases in the Liver by Regulating Gene Expression of TIMP3 and Matrix Metalloproteinases
Source: Oxford University Press journal article supplement (doi:10.1158/0008-5472.can-18-1583), 2018-09-05
Supplement: 00085472can181583-sup-202293_3_supp_4997646_p2915j.docx [file 00085472can181583-sup-202293_3_supp_4997646_p2915j.docx]

**
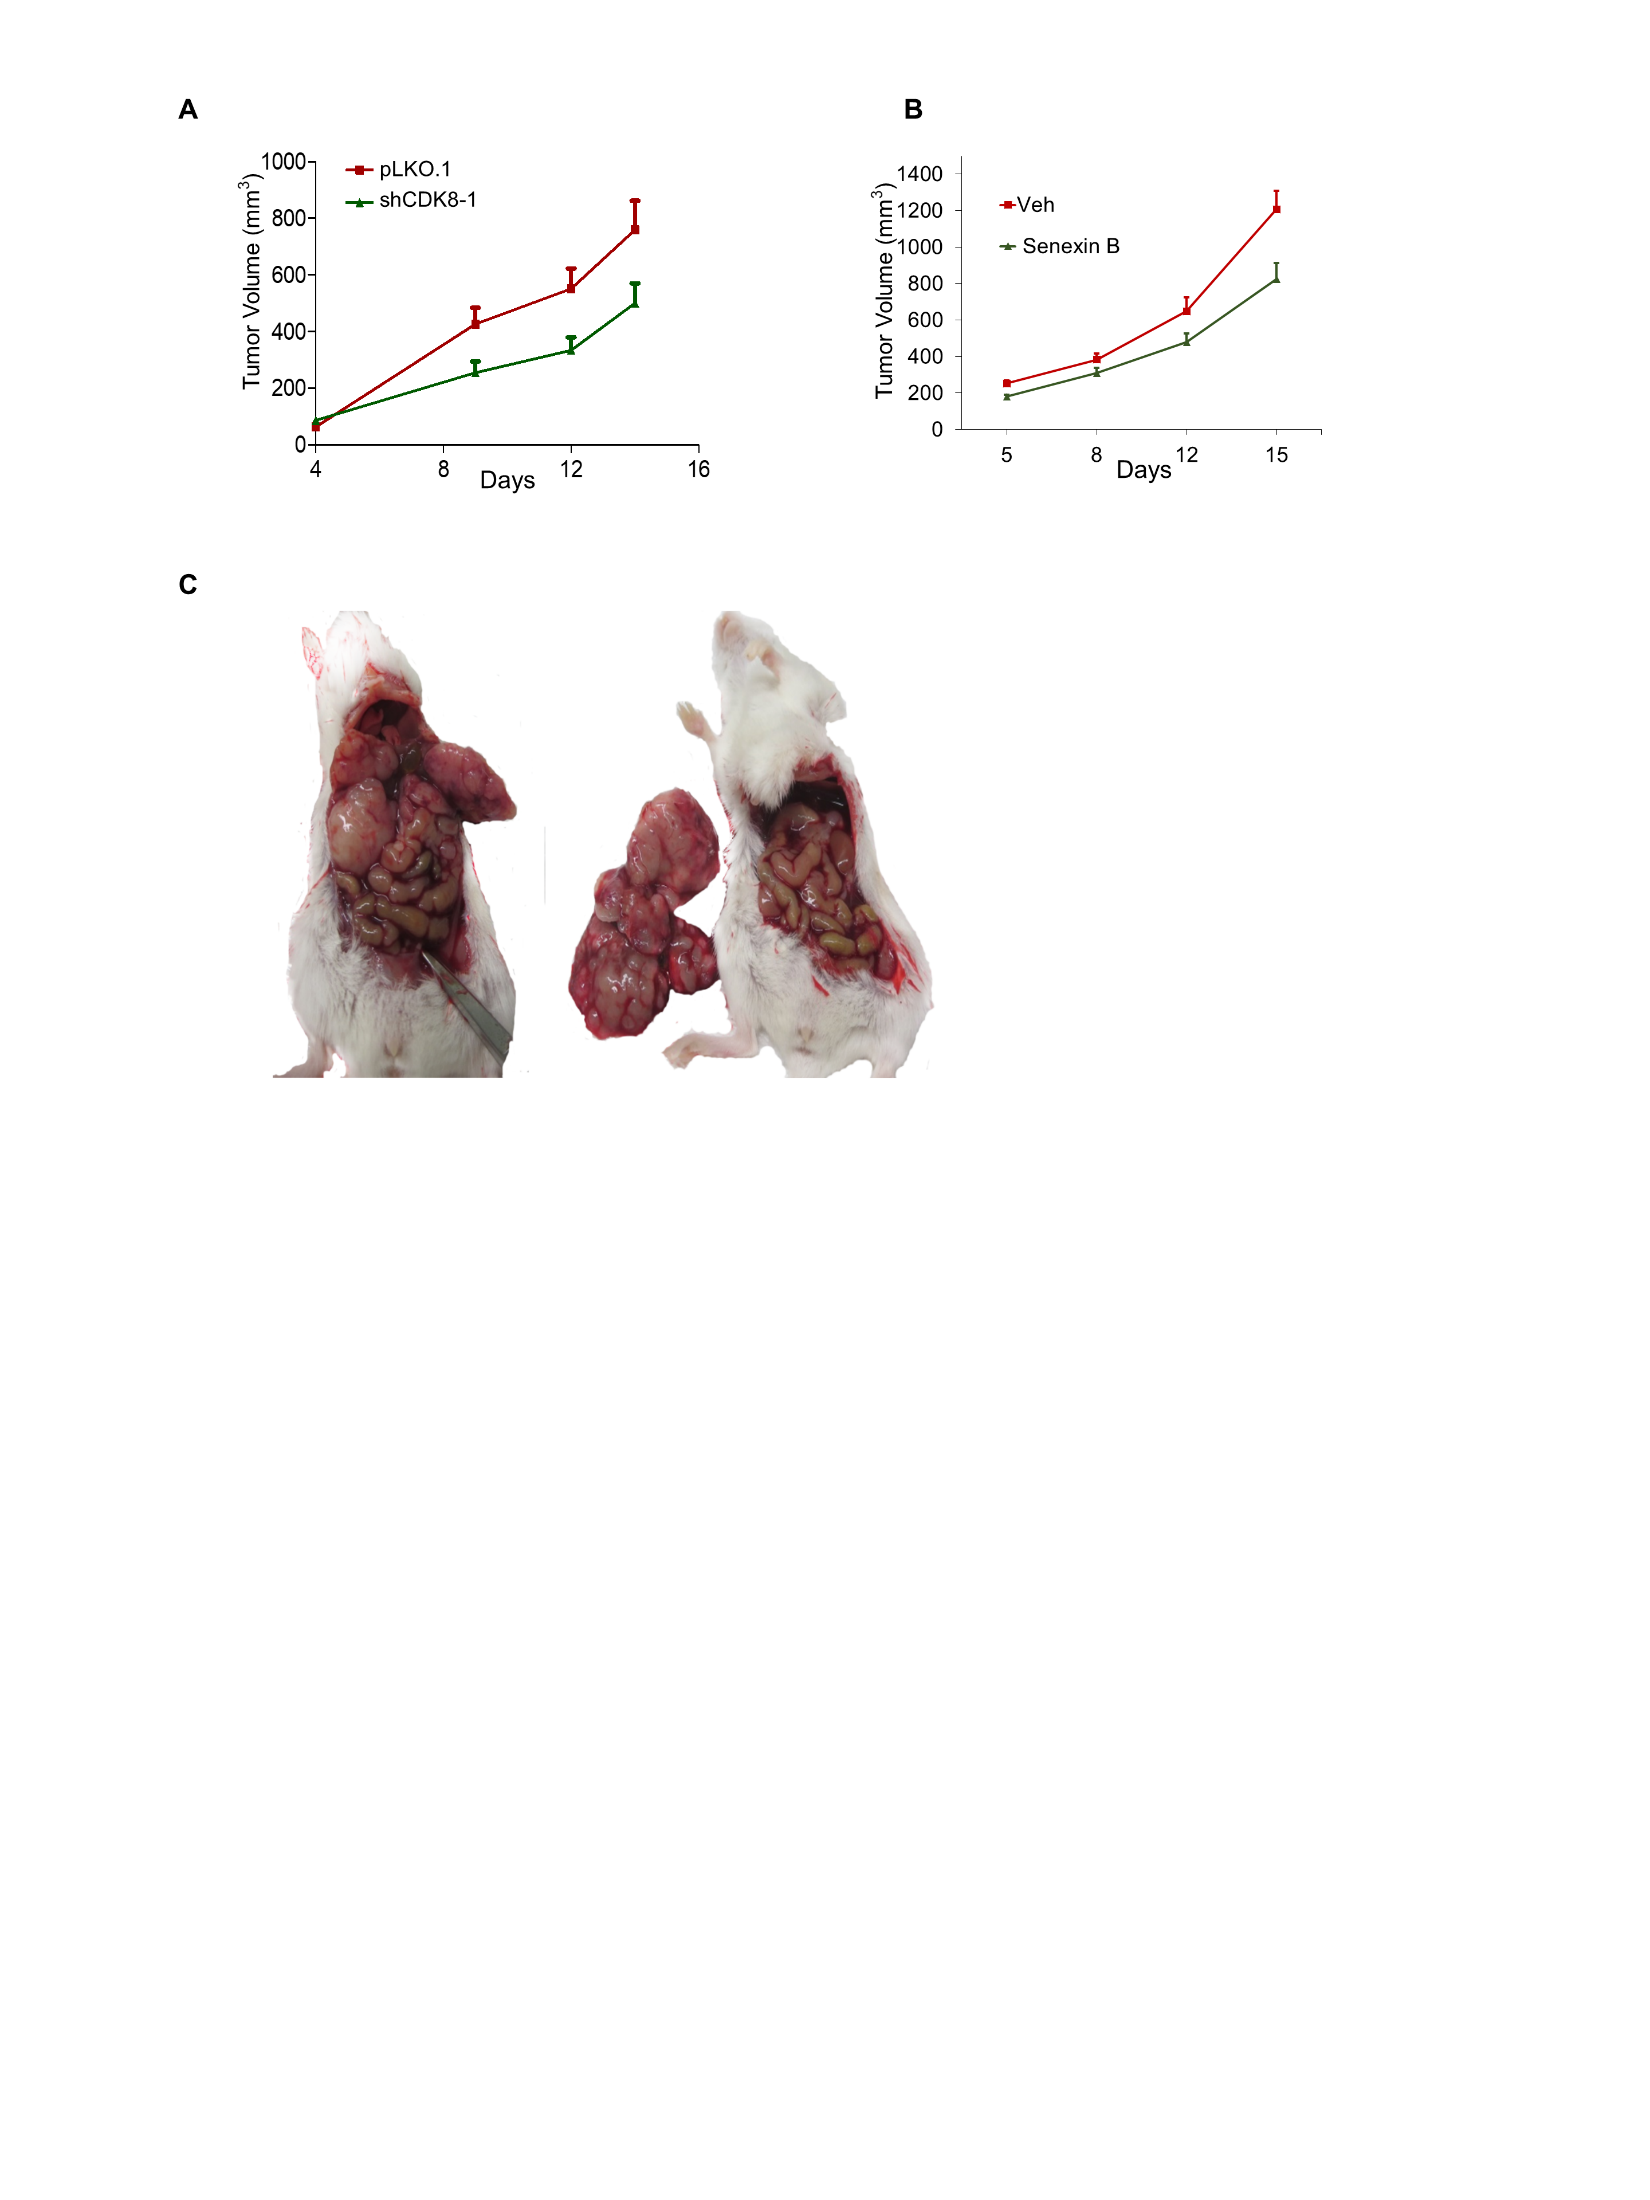
**

**Fig. S1. Supplemental data for effects of CDK8 inhibition on CT26 tumor growth.** A: Effect of CDK8 knockdown on the growth of s.c. tumors relative to CT26-pLKO.1 (control) (n=10). B: Effects of treatment with Senexin B on the growth of s.c. CT26 tumors. Mice received Senexin B (dimaleate, 33 mg/kg, p.o., b.i.d.) or vehicle control (n=10) when the tumor volume reached ~200 mm3. C: Representative macroscopic images of metastatic spread in mice from survival studies. Left: metastasis-containing liver in the abdominal cavity. Right: the abdominal cavity with liver removed.
