# Supplementary material for: CDK8 Selectively Promotes the Growth of Colon Cancer Metastases in the Liver by Regulating Gene Expression of TIMP3 and Matrix Metalloproteinases
Source: Oxford University Press journal article supplement (doi:10.1158/0008-5472.can-18-1583), 2018-09-05
Supplement: 00085472can181583-sup-202293_3_supp_4997649_p9915j.docx [file 00085472can181583-sup-202293_3_supp_4997649_p9915j.docx]

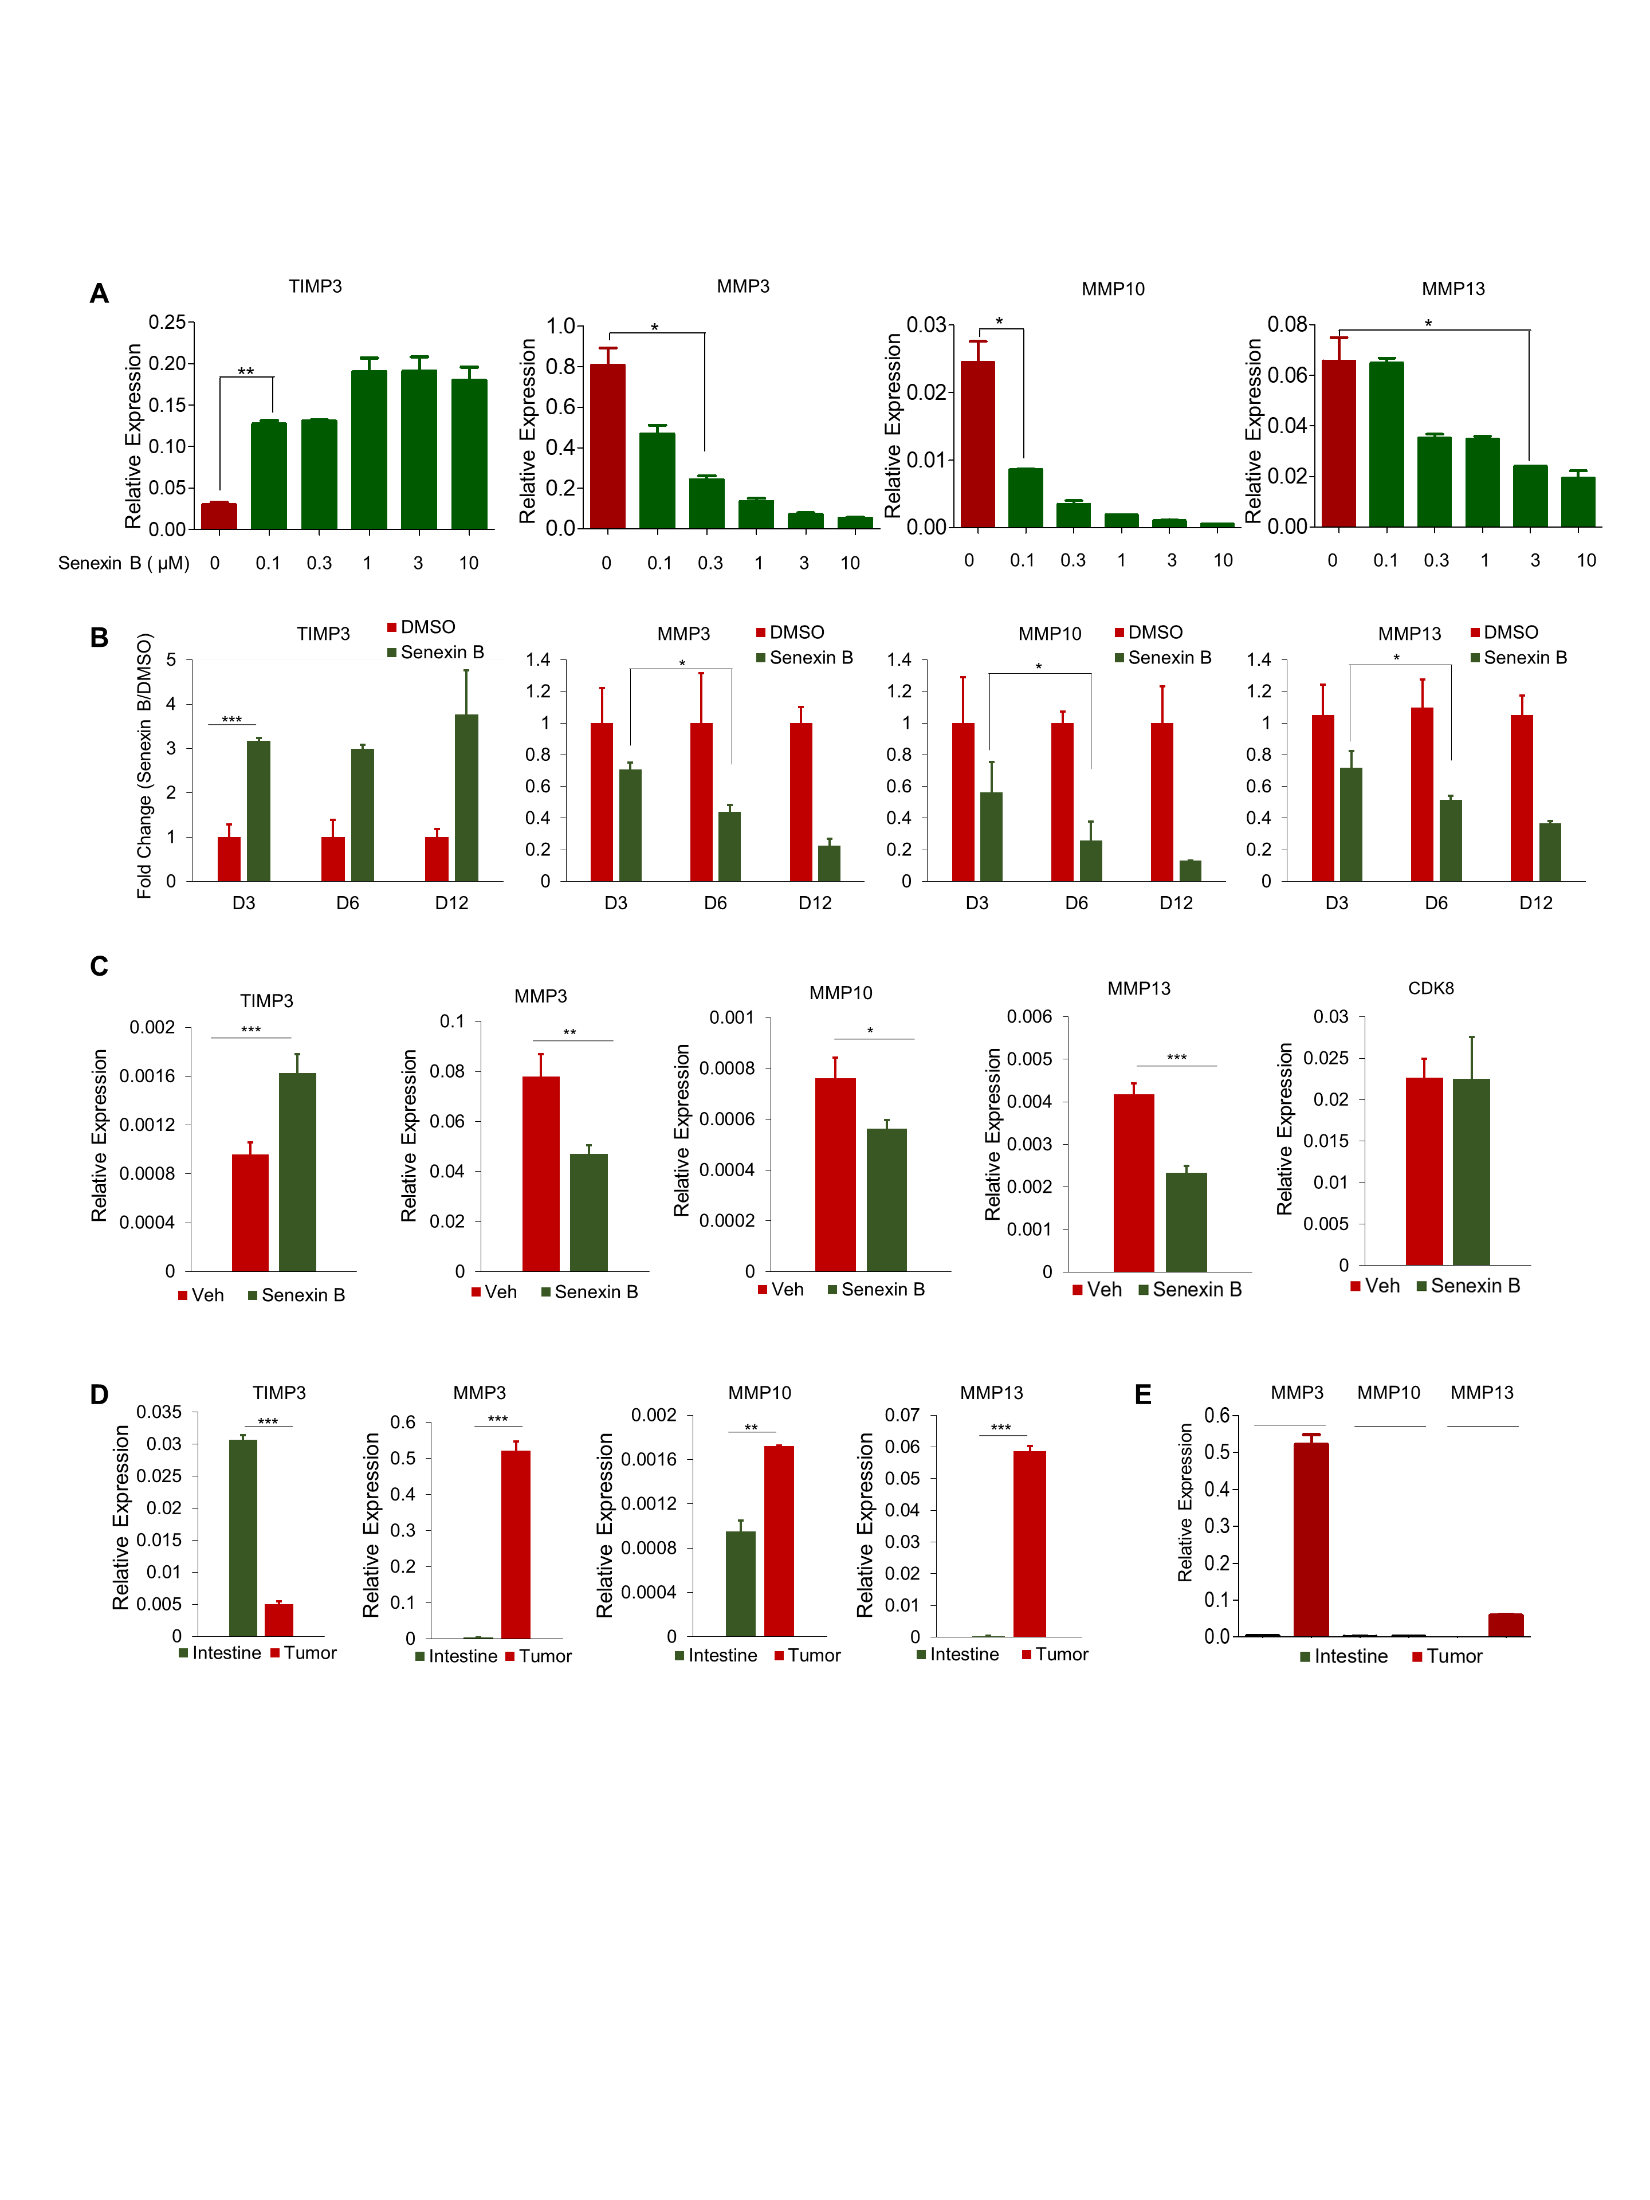


**Fig. S2. Supplemental data for TIMP3 and MMPs expression analysis.** (A) Concentration-dependent effect of Senexin B (24 h treatment) on TIMP3 or MMP3 expression (qPCR, in duplicates). (B) Effects of long-term treatment with 0.5 µM Senexin B for the indicated number of days on the expression of TIMP3, MMP3, MMP10 and MMP13 (qPCR, in duplicates). (C) Effects of in vivo treatment with Senexin B on the expression of TIMP3, MMP3, MMP10, MMP13 and CDK8 in hepatic metastases. Mice (n=6) received vehicle or Senexin B (33 mg/kg, p.o., b.i.d.) starting from the day of splenic inoculation of CT26 cells for 14 days. (D) RNA expression of TIMP3, MMP3, MMP10, and MMP13 in subcutaneous CT26 tumors (n=3) or in the intestine (n=3). (E) Comparison of relative expression levels of MMP3, MMP10 and MMP13 in intestines and s.c. CT26 tumors. * denotes P<0.05, ** denotes P<0.01 and *** denotes P<0.001.
