# Supplementary material for: CDK8 Selectively Promotes the Growth of Colon Cancer Metastases in the Liver by Regulating Gene Expression of TIMP3 and Matrix Metalloproteinases
Source: Oxford University Press journal article supplement (doi:10.1158/0008-5472.can-18-1583), 2018-09-05
Supplement: 00085472can181583-sup-202293_3_supp_4997654_pq915k.docx [file 00085472can181583-sup-202293_3_supp_4997654_pq915k.docx]

**
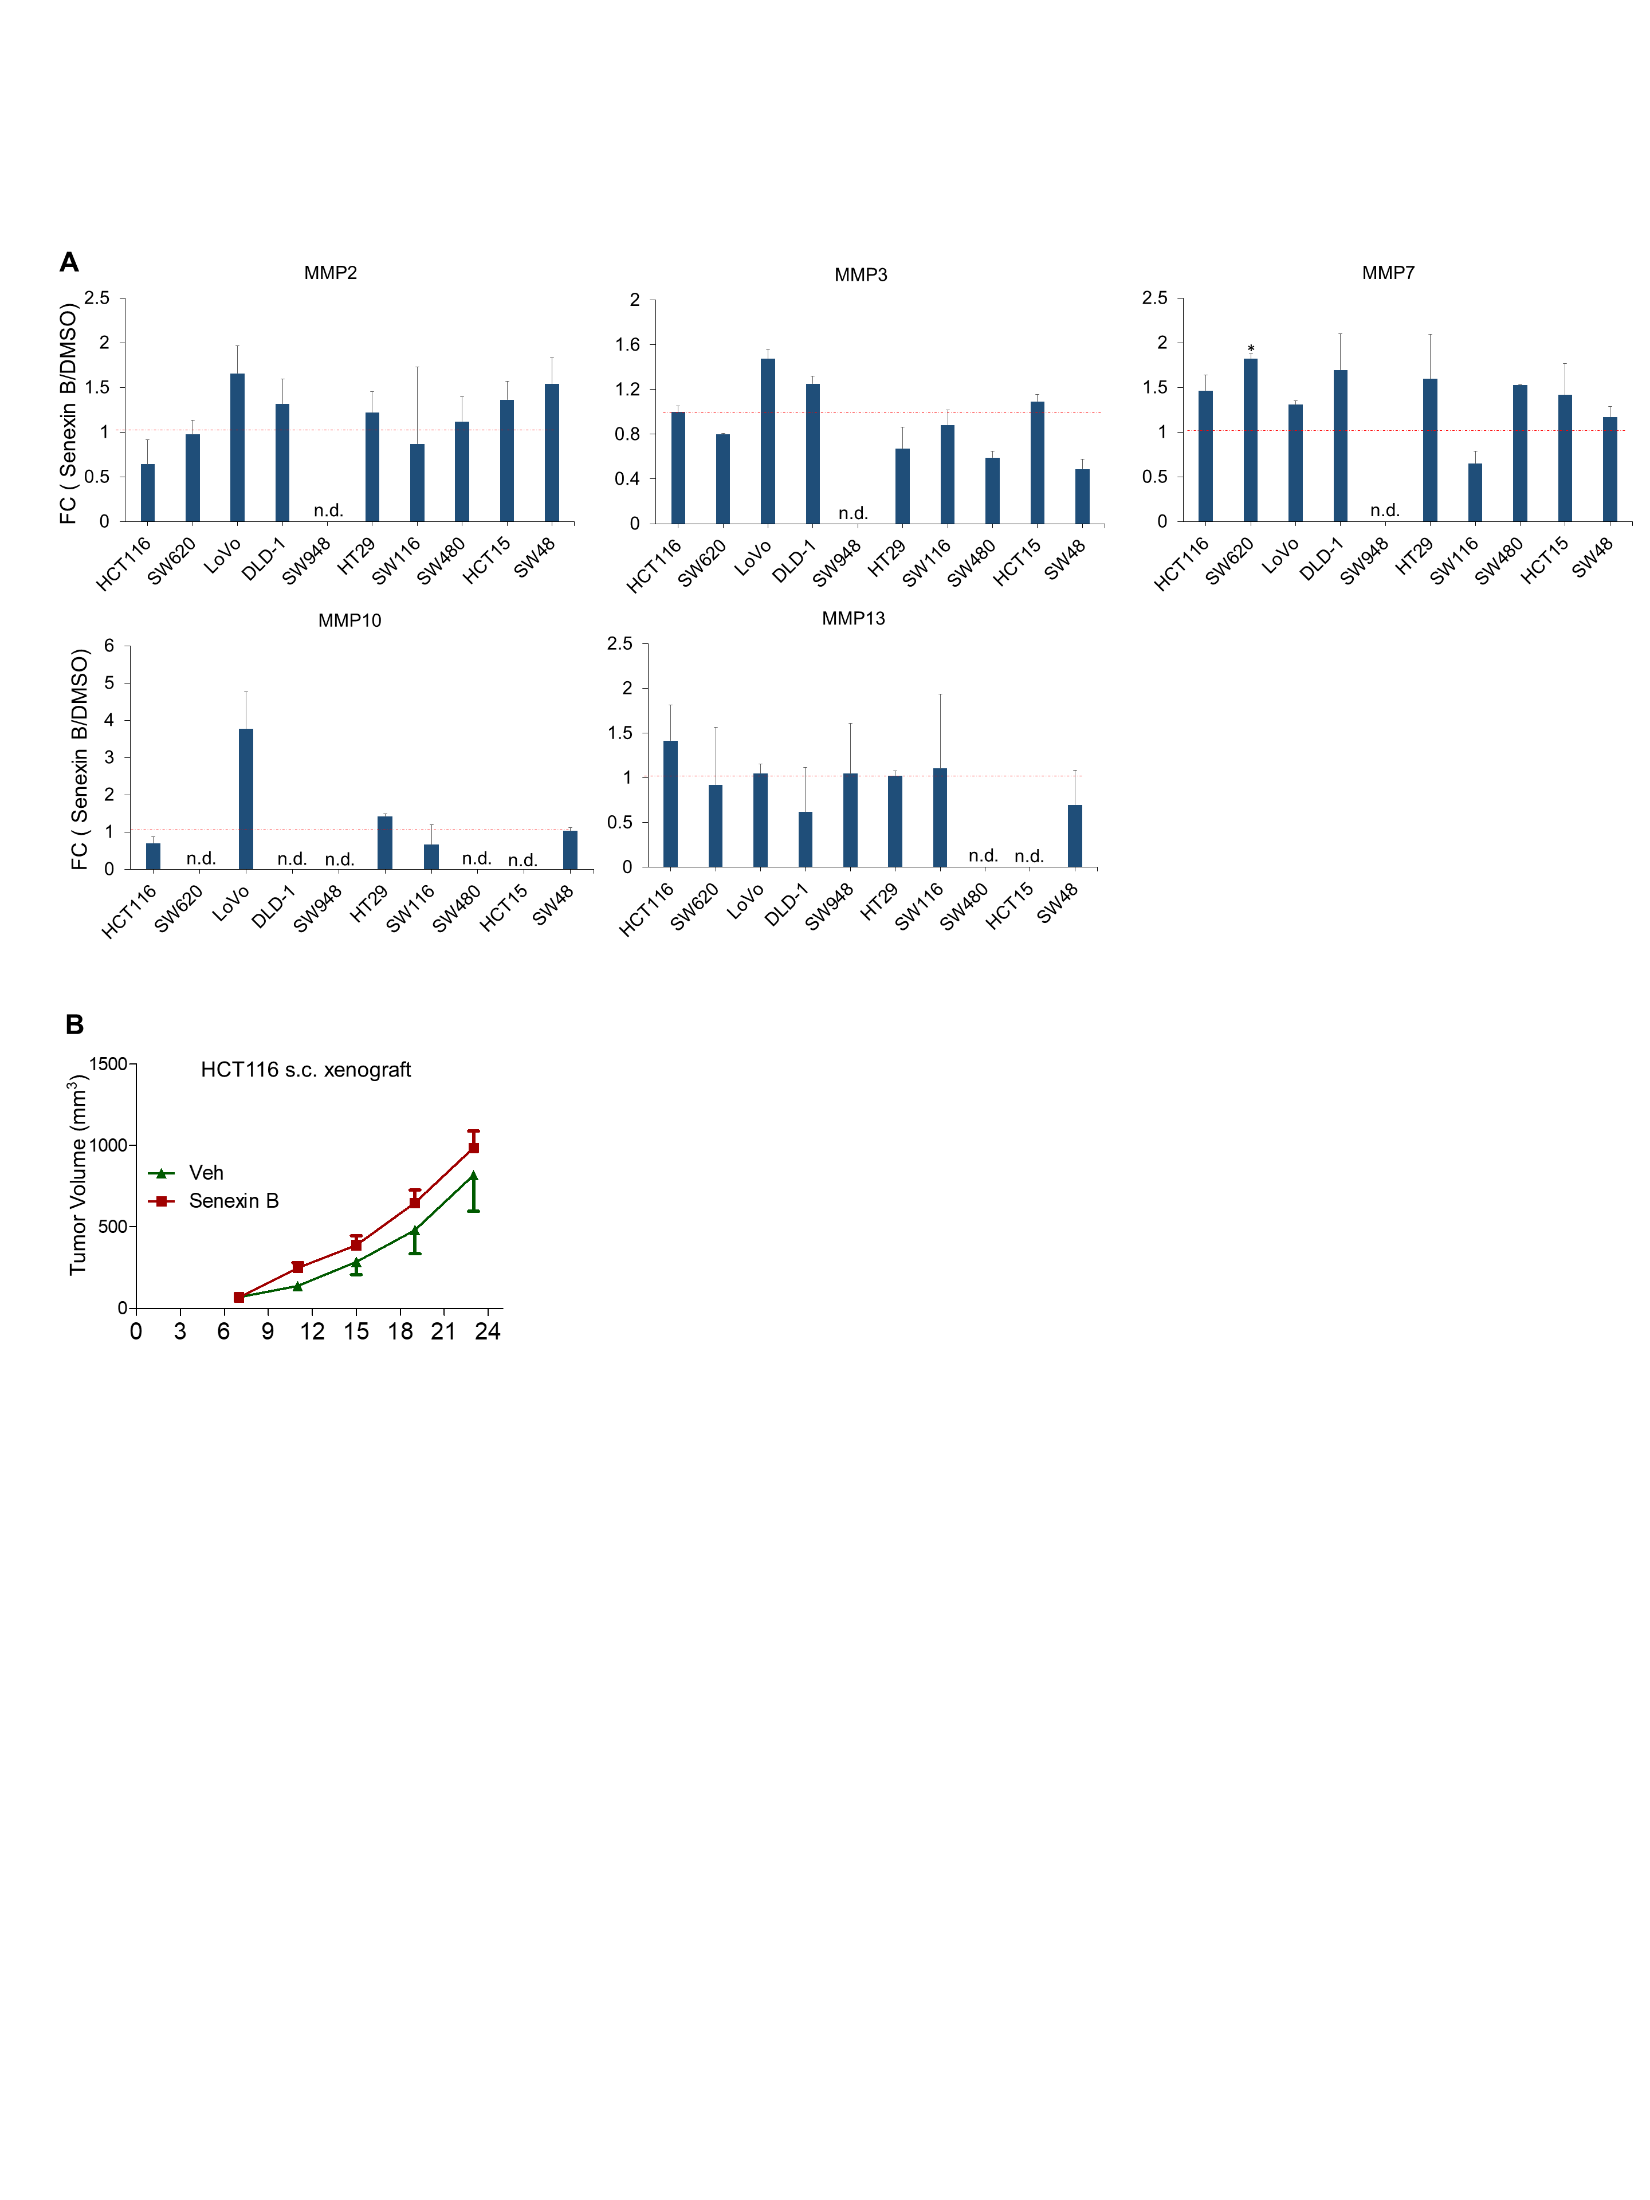
**

**Fig.S5. Effects of Senexin B on the expression of different MMPs in a panel of human colon cancer cell lines and human colon cancer growth s.c.** (A) Effects of Senexin B on the expression of different MMPs in a panel of human colon cancer cell lines. qPCR analysis of the effects of 1 µM Senexin B (24 h treatment) on the expression of the indicated MMPs in the indicated cell lines (qPCR, in duplicates). (B) Dynamics of HCT116 tumor growth s.c. in mice treated with Senexin B (33 mg/kg, p.o., b.i.d) or vehicle control (n = 5).
